# Supplementary material for: Usutu Virus in Bats, Germany, 2013
Source: PubMed Central journal article supplement (PMC4193186; doi:10.3201/eid2010.140909), 2014-10
Supplement: 14-0909-Techapp-s1.pdf [file 14-0909-Techapp-s1.pdf]

# Usutu Virus in Bats, Germany, 2013

## Technical Appendix

Technical Appendix Table. Primers used for the full-length amplification of Usutu virus

| Name         | Primer sequence                   | Position    | Length |
|--------------|-----------------------------------|-------------|--------|
| USUV_GF      | 5'-AGWYGTTSYCTGYGTGAGC-3'         | 1-740       | 740    |
| USUV_731R*   | 5'-CGCTTCGAGTGTCTGGTTCT-3'        |             |        |
| USUV_8F      | 5'-CGTCTGCGTGAGCTCTACTACTTA-3'    | 8-400       | 393    |
| USUV_400R    | 5'-TTTTTGTGCCCGATTGTT-3'          |             |        |
| USUV_52F     | 5'-TGAGATTAACACAGTGCCGG-3'        | 52-832      | 781    |
| USUV_832R    | 5'-ATCTCGAAGCCTTGGTTGAG-3'        |             |        |
| USUV_712F    | 5'-AGGTGCACAAGAACCAGACA-3'        | 712-1727    | 1016   |
| USUV_1727R   | 5'-GATTGCTTTGTGGCATGGGG-3'        |             |        |
| USUV_1560F   | 5'-GTTGAACACCGAGGCATACTACAT-3'    | 1560-2461   | 902    |
| USUV_2434R   | 5'-TGGCGAGAAAGAGGAGCAC-3'         |             |        |
| USUV_2356F   | 5'-CAGGGTCTAATGGGAGCTCT-3'        | 2356-3320   | 965    |
| USUV_3320R   | 5'-CCTGGGCAATAGTCAAAGTC-3'        |             |        |
| USUV_3241F   | 5'-CGGCGTGAAGGTTACAAAGT-3'        | 3241-4160   | 920    |
| USUV_4160R   | 5'-GAGAAGTGCCTGTTGATGT-3'         |             |        |
| USUV_3776F   | 5'-CCTTCAAATTCACCAGGC-3'          | 3776-4778   | 1001   |
| USUV_4778R   | 5'-ATAGCTGCCCTCTTGTGGT-3'         |             |        |
| USUV_4541F   | 5'-GGACACCATGGGCAATAATACCT-3'     | 4541-5872   | 1332   |
| USUV_5872R   | 5'-CTCTGCTGGCCCCAAAGTTCCG-3'      |             |        |
| USUV_5669F   | 5'-ACACCGGGAAAACAGTCTGG-3'        | 5669-6802   | 1134   |
| USUV_6802R   | 5'-TGAGCAGAGCCAGCAATARR-3'        |             |        |
| USUV_6661F   | 5'-GTTTTCTTGCTCCTCGTTCA-3'        | 6661-7457   | 797    |
| USUV_7457R   | 5'-CCAATCAGTAAAATCTGGCC-3'        |             |        |
| USUV_7368F   | 5'-GGTAGATGGTTTGGTGGCTA-3'        | 7368-8160   | 793    |
| USUV_8160R   | 5'-TTGTTCTTCCACCTCAGCAC-3'        |             |        |
| USUV_8038F   | 5'-TATGGCTGGAACCTTGTACAC-3'       | 8038-9057   | 1020   |
| USUV_9057R   | 5'-CCCCATCATGTTGTAATGC-3'         |             |        |
| USUV_8987F   | 5'-AAATGGTGGACGAAGAAAGG-3'        | 8987-9865   | 879    |
| USUV_9865R   | 5'-TCCTCCGTCCTTCATGATC-3'         |             |        |
| USUV_9643F   | 5'-GAGAACCGGAGAAGAAAGGGT-3'       | 9643-10823  | 1181   |
| USUV_10823R  | 5'-AACAGTTCGCATCACCGTCT-3'        |             |        |
| USUV_10673F  | 5'-GGGACCCTGCCTATTGG-3'           | 10673-11027 | 355    |
| USUV_11027R  | 5'-GCGCTCTGTGCCTTGTGGTTGAT-3'     |             |        |
| USUV_ADF     | 5'-GAAAGCCCCTCAGAACCGTTTC-3'      | 10646-11066 | 420    |
| USUV_11014R* | 5'-AGATCCTGTGKTCTWSYYCMCCAYCAG-3' |             |        |

\*Nucleotide positions are according to the Vienna strain genome (GenBank accession no. AY453411) (1).

## Reference

1. Bakonyi T, Gould EA, Kolodziejek J, Weissenböck H, Nowotny N. Complete genome analysis and molecular characterization of Usutu virus that emerged in Austria in 2001: comparison with the South African strain SAAR-1776 and other flaviviruses. *Virology*. 2004;328:301–10. **PMID: 15464850**
